# Supplementary material
Source: HighWire-hosted journal article supplement (https://molpharm.aspetjournals.org/highwire/filestream/80767/field_highwire_adjunct_files/0/108944suppl_tables.pdf)
Supplement: 108944suppl_tables.pdf [file 108944suppl_tables.pdf]

# **Identification of AICP as a GluN2C-selective NMDA receptor superagonist at the GluN1 glycine site**

Maja Jessen, Kristen Frederiksen, Feng Yi, Rasmus P. Clausen, Kasper B. Hansen, Hans Bräuner-Osborne, Paul Kilburn, and Anders Damholt.

Department of Molecular Screening, H. Lundbeck A/S, Valby, Denmark (M.J., K.F., A.D.); Present Address: Clinical Development, Chr. Hansen A/S, Hørsholm, Denmark (A.D.); Department of Drug Design and Pharmacology, University of Copenhagen, Copenhagen, Denmark (M.J., R.P.C., H.B.-O.); Department of Medicinal Chemistry 1, H. Lundbeck A/S, Valby, Denmark (P.K.); and Department of Biomedical and Pharmaceutical Sciences, University of Montana, Missoula, Montana, USA (F.Y., K.B.H.)

**MOLECULAR PHARMACOLOGY**

**SUPPLEMENTAL DATA**

**Supplemental Table 1.** Influence of glutamate concentrations on AICP concentration-response data at rat NMDA receptor subtypes.

|                          | GluN1/2A                       |                                |                                |                |    | GluN1/2B                       |                                |                               |                |   |
|--------------------------|--------------------------------|--------------------------------|--------------------------------|----------------|----|--------------------------------|--------------------------------|-------------------------------|----------------|---|
|                          | EC <sub>50</sub><br>[ $\mu$ M] | pEC <sub>50</sub> $\pm$<br>SEM | Rel. I <sub>max</sub><br>(%)   | n <sub>H</sub> | N  | EC <sub>50</sub><br>[ $\mu$ M] | pEC <sub>50</sub> $\pm$<br>SEM | Rel. I <sub>max</sub><br>(%)  | n <sub>H</sub> | N |
| AICP (+ 30 $\mu$ M Glu)  | <b>0.048</b>                   | 7.33 $\pm$ 0.03                | <b>83</b> $\pm$ 2              | 1.2            | 12 | <b>0.014</b>                   | 7.88 $\pm$ 0.06                | <b>7</b> $\pm$ 0              | 1.1            | 6 |
| AICP (+ 100 $\mu$ M Glu) | <b>0.041</b>                   | 7.39 $\pm$ 0.02                | <b>88</b> $\pm$ 2              | 1.2            | 16 | <b>0.013</b>                   | 7.90 $\pm$ 0.03                | <b>8</b> $\pm$ 0              | 1.1            | 9 |
| AICP (+ 300 $\mu$ M Glu) | <b>0.043</b>                   | 7.37 $\pm$ 0.01                | <b>95</b> $\pm$ 1 <sup>†</sup> | 1.2            | 8  | <b>0.016</b>                   | 7.80 $\pm$ 0.05                | <b>9</b> $\pm$ 1 <sup>†</sup> | 1.1            | 5 |

  

|                          | GluN1/2C                       |                                |                              |                |    | GluN1/2D                       |                                |                                |                |   |
|--------------------------|--------------------------------|--------------------------------|------------------------------|----------------|----|--------------------------------|--------------------------------|--------------------------------|----------------|---|
|                          | EC <sub>50</sub><br>[ $\mu$ M] | pEC <sub>50</sub> $\pm$<br>SEM | Rel. I <sub>max</sub><br>(%) | n <sub>H</sub> | N  | EC <sub>50</sub><br>[ $\mu$ M] | pEC <sub>50</sub> $\pm$<br>SEM | Rel. I <sub>max</sub><br>(%)   | n <sub>H</sub> | N |
| AICP (+ 30 $\mu$ M Glu)  | <b>0.0004</b>                  | 9.37 $\pm$ 0.02                | <b>310</b> $\pm$ 6           | 1.0            | 6  | <b>0.032</b>                   | 7.50 $\pm$ 0.05                | <b>22</b> $\pm$ 1              | 1.6            | 6 |
| AICP (+ 100 $\mu$ M Glu) | <b>0.0010</b>                  | 9.04 $\pm$ 0.04 <sup>†</sup>   | <b>340</b> $\pm$ 12          | 1.1            | 14 | <b>0.029</b>                   | 7.54 $\pm$ 0.04                | <b>28</b> $\pm$ 2 <sup>†</sup> | 1.4            | 5 |
| AICP (+ 300 $\mu$ M Glu) | <b>0.0010</b>                  | 9.03 $\pm$ 0.03 <sup>†</sup>   | <b>338</b> $\pm$ 16          | 0.9            | 3  | <b>0.033</b>                   | 7.48 $\pm$ 0.03                | <b>25</b> $\pm$ 1              | 1.5            | 6 |

Concentration-response data for AICP at recombinant rat NMDA receptor subtypes measured using two-electrode voltage-clamp electrophysiology in the presence of 30, 100, or 300  $\mu$ M glutamate (Glu).

Relative (Rel.) I<sub>max</sub> is the fitted maximal response relative to the maximal response to glycine, n<sub>H</sub> is the Hill coefficient, and N is the number of oocytes. <sup>†</sup> significantly different from AICP data at the same receptor in 30  $\mu$ M glutamate (p < 0.05, one-way ANOVA with Tukey's post-test).

**Supplemental Table 2.** Concentration-response data for AICP and DCS at wild type and mutant rat GluN1/2A and GluN1/2C receptors.

| Receptor              | Compound | EC <sub>50</sub> [μM] | pEC <sub>50</sub> ± SEM | n <sub>H</sub> | N  | Fold increase in EC <sub>50</sub> compared to wild type |
|-----------------------|----------|-----------------------|-------------------------|----------------|----|---------------------------------------------------------|
| GluN1/2A              | AICP     | 0.036                 | 7.49 ± 0.05             | 1.3            | 29 | -                                                       |
|                       | DCS      | 18                    | 4.75 ± 0.01             | 1.6            | 13 | -                                                       |
| GluN1(F484A)/2A       | AICP     | 13                    | 4.98 ± 0.14             | 1.5            | 5  | 360                                                     |
|                       | DCS      | > 10 mM               | -                       | -              | 3  | -                                                       |
| GluN1(R523A)/2A       | AICP     | 4.9                   | 5.38 ± 0.12             | 1.7            | 5  | 140                                                     |
|                       | DCS      | 880                   | 3.06 ± 0.04             | 1.7            | 4  | 49                                                      |
| GluN1(T518L)/2A       | AICP     | 16                    | 4.82 ± 0.05             | 1.6            | 8  | 440                                                     |
|                       | DCS      | N.R.                  | N.R.                    | N.R.           | 4  | -                                                       |
| GluN1(F484A/T518L)/2A | AICP     | N.R.                  | N.R.                    | N.R.           | 6  | -                                                       |
|                       | DCS      | N.R.                  | N.R.                    | N.R.           | 4  | -                                                       |
| GluN1/2C              | AICP     | 0.0010                | 9.04 ± 0.03             | 1.0            | 17 | -                                                       |
|                       | DCS      | 2.8                   | 5.55 ± 0.01             | 1.5            | 18 | -                                                       |
| GluN1(F484A)/2C       | AICP     | 9.7                   | 5.01 ± 0.01             | 1.6            | 6  | 9700                                                    |
|                       | DCS      | > 10 mM               | -                       | -              | 4  | -                                                       |
| GluN1(R523A)/2C       | AICP     | 3.6                   | 5.44 ± 0.01             | 1.6            | 6  | 3600                                                    |
|                       | DCS      | 250                   | 3.61 ± 0.01             | 1.6            | 5  | 89                                                      |
| GluN1(T518L)/2C       | AICP     | 1.2                   | 5.93 ± 0.01             | 1.8            | 8  | 1200                                                    |
|                       | DCS      | > 10 mM               | -                       | -              | 4  | -                                                       |
| GluN1(F484A/T518L)/2C | AICP     | N.R.                  | N.R.                    | N.R.           | 6  | -                                                       |
|                       | DCS      | N.R.                  | N.R.                    | N.R.           | 4  | -                                                       |

Concentration-response data for AICP and DCS at recombinant wild type or mutated rat GluN1/2A and GluN1/2C receptors measured using two-electrode voltage-clamp electrophysiology in the presence of 100-300 μM glutamate. Relative (Rel.) I<sub>max</sub> is the fitted maximal response, n<sub>H</sub> is the Hill coefficient, and N is the number of oocytes. N.R. indicates < 10% response to 30-100 μM AICP, 30 mM DCS, or 30 mM glycine, and - indicates not determined.

**Supplemental Table 3.** Concentration-response data for AICP at human NMDA receptor subtypes in the presence of glycine.

| Receptor | Glycine<br>[ $\mu$ M] | EC <sub>50</sub> [ $\mu$ M]<br>/ IC <sub>50</sub> [ $\mu$ M] | pEC <sub>50</sub> $\pm$ SEM<br>/ pIC <sub>50</sub> $\pm$ SEM | Rel. I <sub>max</sub><br>(%)    | Rel. I <sub>min</sub><br>(%)   | n <sub>H</sub> | N   |
|----------|-----------------------|--------------------------------------------------------------|--------------------------------------------------------------|---------------------------------|--------------------------------|----------------|-----|
| GluN1/2A | 0.6                   | <b>0.027</b>                                                 | 7.56 $\pm$ 0.07                                              | <b>99</b> $\pm$ 2               | <b>29</b> $\pm$ 3              | 1.2            | 5   |
|          | 100                   | <b>ND</b>                                                    | ND                                                           | <b>102</b> $\pm$ 2 <sup>#</sup> | <b>95</b> $\pm$ 3 <sup>#</sup> | ND             | 10  |
| GluN1/2B | 0.6                   | <b>0.013</b>                                                 | 7.88 $\pm$ 0.18                                              | <b>59</b> $\pm$ 5               | <b>14</b> $\pm$ 2              | -0.9           | 6   |
|          | 100                   | <b>5.1</b>                                                   | 5.29 $\pm$ 0.11 <sup>†</sup>                                 | <b>93</b> $\pm$ 2               | <b>20</b> $\pm$ 6              | -1.1           | 5-6 |
| GluN1/2C | 0.6                   | <b>0.013</b>                                                 | 7.88 $\pm$ 0.07                                              | <b>337</b> $\pm$ 8              | <b>60</b> $\pm$ 12             | 1.2            | 5-6 |
|          | 100                   | <b>1.4</b>                                                   | 5.85 $\pm$ 0.10 <sup>†</sup>                                 | <b>321</b> $\pm$ 20             | <b>105</b> $\pm$ 4             | 1.1            | 4-6 |
| GluN1/2D | 0.6                   | <b>1.1</b>                                                   | 5.97 $\pm$ 0.07                                              | <b>92</b> $\pm$ 2               | <b>45</b> $\pm$ 3              | -2.5           | 5-8 |
|          | 100                   | <b>42</b>                                                    | 4.38 $\pm$ 0.55 <sup>†</sup>                                 | <b>104</b> $\pm$ 2              | <b>48</b> $\pm$ 37             | -1.3           | 5-8 |

Concentration-response data for AICP at recombinant human NMDA receptor subtypes measured using two-electrode voltage-clamp electrophysiology in the presence of 100  $\mu$ M glutamate and 100  $\mu$ M or 0.6  $\mu$ M glycine. Relative (Rel.) I<sub>max</sub> and Rel. I<sub>min</sub> are the fitted maximal and minimal responses relative to the maximal response to glycine, n<sub>H</sub> is the Hill coefficient, and N is the number of oocytes. Negative n<sub>H</sub> indicates inhibition by AICP, ND indicates not determined, and # indicates that Rel. I<sub>max</sub> and Rel. I<sub>min</sub> are determined as the average responses to the lowest and highest concentrations of AICP, respectively, relative to the maximal response to glycine. <sup>†</sup> significantly different from pEC<sub>50</sub> or pIC<sub>50</sub> at the same receptor in 0.6  $\mu$ M glycine (p < 0.05, one-way ANOVA with Tukey's post-test).

**Supplemental Table 4.** Concentration-response data for AICP and DCS at mutant and chimeric GluN1/2A, GluN1/2B, and GluN1/2C receptors.

| Receptor          | Compound | EC <sub>50</sub> [ $\mu$ M] | pEC <sub>50</sub> $\pm$ SEM | Rel. I <sub>max</sub> (%) | n <sub>H</sub> | N  |
|-------------------|----------|-----------------------------|-----------------------------|---------------------------|----------------|----|
| GluN1/2A          | AICP     | 0.036                       | 7.49 $\pm$ 0.05             | <b>92</b> $\pm$ 2         | 1.3            | 29 |
|                   | DCS      | 18                          | 4.75 $\pm$ 0.01             | <b>91</b> $\pm$ 1         | 1.6            | 13 |
| GluN1/2B          | AICP     | 0.014                       | 7.86 $\pm$ 0.03             | <b>9</b> $\pm$ 0          | 1.1            | 14 |
|                   | DCS      | 8.3                         | 5.08 $\pm$ 0.01             | <b>61</b> $\pm$ 0         | 1.4            | 12 |
| GluN1/2C          | AICP     | 0.0010                      | 9.04 $\pm$ 0.03             | <b>339</b> $\pm$ 10       | 1.0            | 17 |
|                   | DCS      | 2.8                         | 5.55 $\pm$ 0.01             | <b>197</b> $\pm$ 2        | 1.5            | 18 |
| GluN1/2B E790Q    | AICP     | 0.0050                      | 8.31 $\pm$ 0.03             | <b>9</b> $\pm$ 1          | 1.7            | 11 |
|                   | DCS      | 11                          | 4.97 $\pm$ 0.01             | <b>81</b> $\pm$ 0         | 1.4            | 9  |
| GluN1/2C Q800E    | AICP     | 0.012                       | 7.93 $\pm$ 0.02             | <b>607</b> $\pm$ 22       | 1.3            | 9  |
|                   | DCS      | 4.4                         | 5.35 $\pm$ 0.01             | <b>143</b> $\pm$ 3        | 1.5            | 8  |
| GluN1/2A-(2C ATD) | AICP     | 0.025                       | 7.60 $\pm$ 0.02             | <b>97</b> $\pm$ 5         | 1.2            | 6  |
|                   | DCS      | 33                          | 4.48 $\pm$ 0.03             | <b>75</b> $\pm$ 2         | 1.5            | 6  |
| GluN1/2C-(2A ATD) | AICP     | 0.0013                      | 8.89 $\pm$ 0.04             | <b>98</b> $\pm$ 7         | 0.8            | 6  |
|                   | DCS      | 5.6                         | 5.26 $\pm$ 0.03             | <b>104</b> $\pm$ 0        | 1.4            | 7  |

Concentration-response data for AICP and DCS at recombinant rat NMDA receptors measured using two-electrode voltage-clamp electrophysiology in the presence of 100-300  $\mu$ M glutamate. Relative (Rel.) I<sub>max</sub> is the fitted maximal response relative to the maximal response to glycine, n<sub>H</sub> is the Hill coefficient, and N is the number of oocytes.
